# Supplementary material
Source: Springer Nature journal article supplement (https://www.springermedizin.de/resource/supplementary/12885_2014_5082_MOESM2_ESM.pdf/9468354)

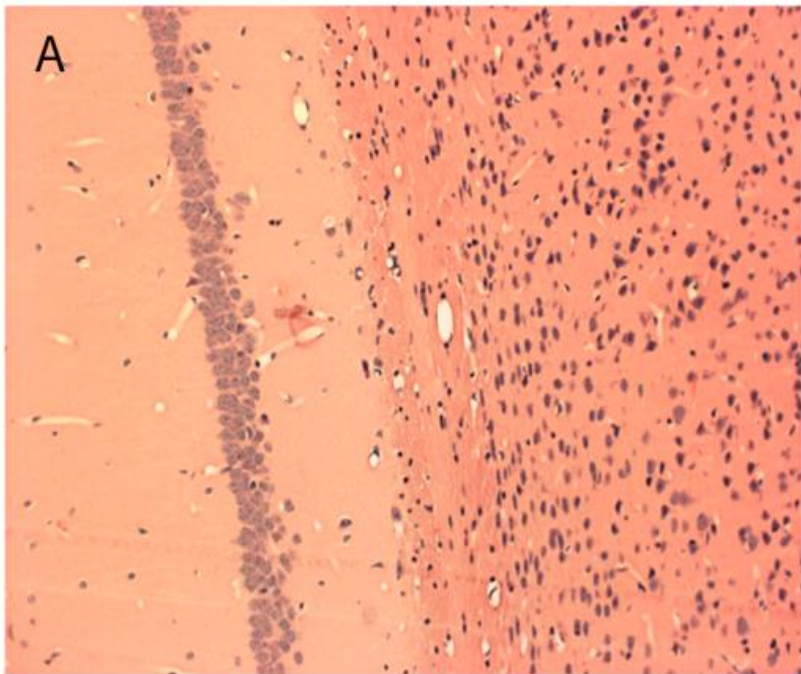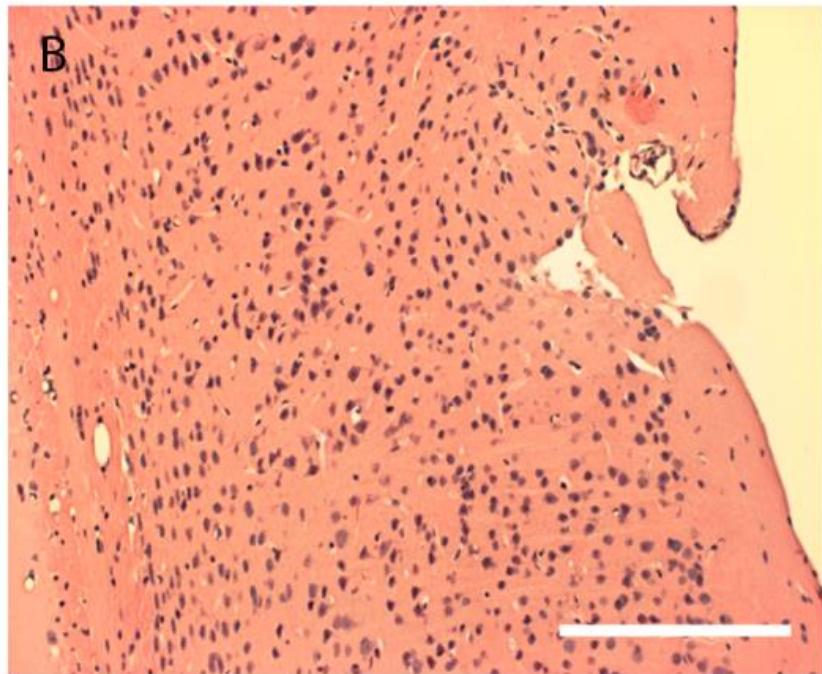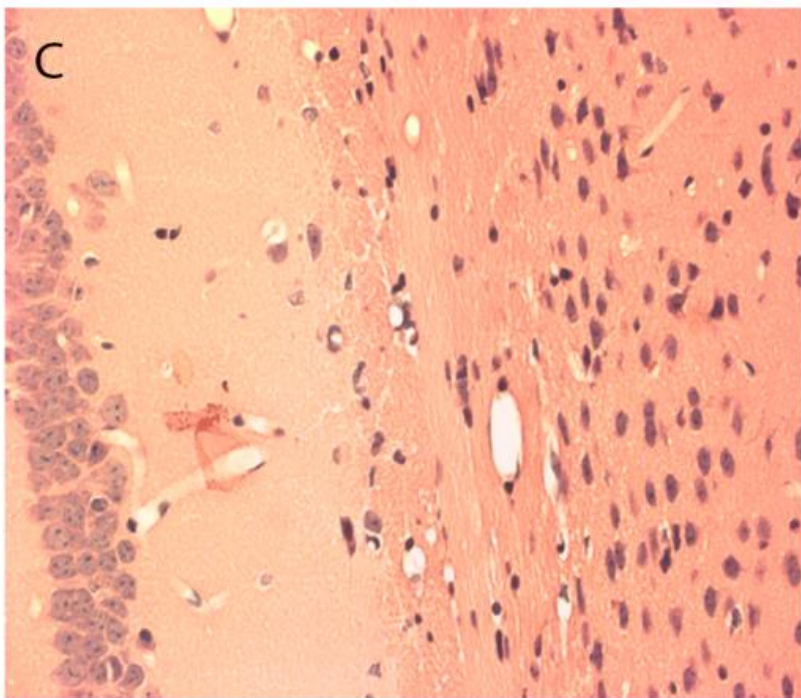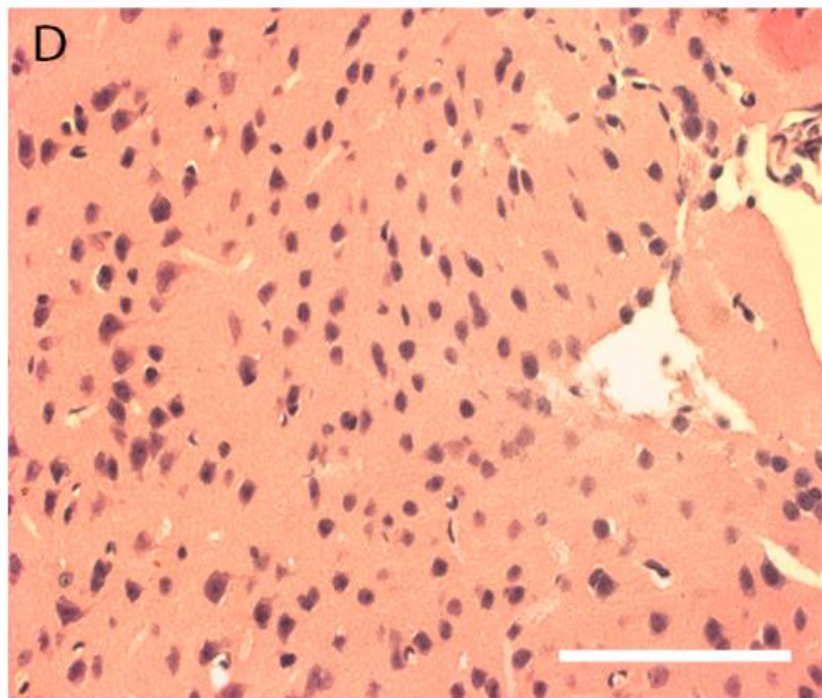

Supplement: MOESM2 [file 9468354]
